# Supplementary material for: Molecular relationships of Campomanesia xanthocarpa within Myrtaceae based on the complete plastome sequence and on the plastid ycf2 gene
Source: PubMed Central journal article supplement (PMC7288672; doi:10.1590/1678-4685-gmb-2018-0377), 2020-06-10
Supplement: 1415-4757-GMB-43-2-e20180377-suppl3.pdf [file 1415-4757-GMB-43-2-e20180377-suppl3.pdf]

## Supplementary Material to "Molecular relationships of *Campomanesia xanthocarpa* within Myrtaceae based on the complete plastome sequence and on the plastid *ycf2* gene"

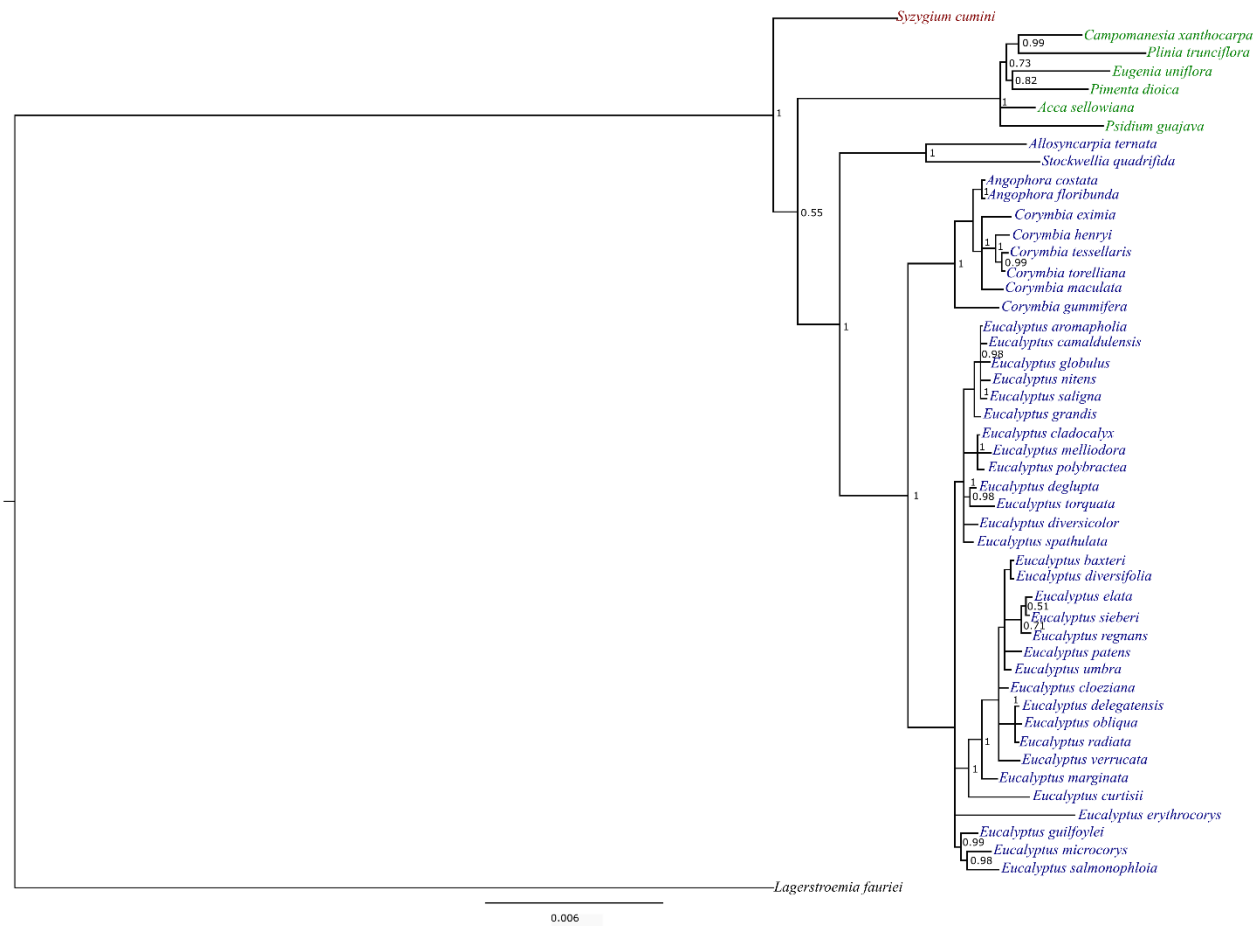

**Figure S3** - Bayesian phylogeny based on five most variable genes (*atpA*, *rpoC2*, *pcbE*, *ndhH* and *rps16*) on chloroplast sequences of 48 Myrtaceae species and the outgroup *Lagerstroemia fauriei* (Myrtales: Lythraceae; KT358807). Branch length is proportional to the inferred divergence level.
