# Supplementary material for: Molecular relationships of Campomanesia xanthocarpa within Myrtaceae based on the complete plastome sequence and on the plastid ycf2 gene
Source: PubMed Central journal article supplement (PMC7288672; doi:10.1590/1678-4685-gmb-2018-0377), 2020-06-10
Supplement: 1415-4757-GMB-43-2-e20180377-suppl4.pdf [file 1415-4757-GMB-43-2-e20180377-suppl4.pdf]

## Supplementary Material to " Molecular relationships of *Campomanesia xanthocarpa* within Myrtaceae based on the complete plastome sequence and on the plastid *ycf2* gene"

**Table S1** - List of genes identified in *Campomanesia xanthocarpa* chloroplast genome

| Category of genes               | Group of genes                    | Name of genes                   |                                |                              |                              |                              |                           |                 |                              |                              |  |
|---------------------------------|-----------------------------------|---------------------------------|--------------------------------|------------------------------|------------------------------|------------------------------|---------------------------|-----------------|------------------------------|------------------------------|--|
| <b>Self replication</b>         | Large subunit of ribosome         | <i>rpl14</i>                    | <i>rpl16</i>                   | <i>rpl2</i> <sup>a,b</sup>   | <i>rpl20</i>                 | <i>rpl22</i>                 | <i>rpl23</i> <sup>b</sup> | <i>rpl32</i>    | <i>rpl33</i>                 | <i>rpl36</i>                 |  |
|                                 | DNA-dependent RNA polymerase      | <i>rpoA</i>                     | <i>rpoB</i>                    | <i>rpoC1</i> <sup>a</sup>    | <i>rpoC2</i>                 |                              |                           |                 |                              |                              |  |
|                                 | Small subunit of ribosome         | <i>rps11</i>                    | <i>rps12</i> <sup>b,*</sup>    | <i>rps14</i>                 | <i>rps15</i>                 | <i>rps16</i> <sup>a</sup>    | <i>rps18</i>              | <i>rps19</i>    | <i>rps2</i>                  | <i>rps3</i>                  |  |
|                                 |                                   | <i>rps4</i>                     | <i>rps7</i> <sup>b</sup>       | <i>rps8</i>                  |                              |                              |                           |                 |                              |                              |  |
|                                 | Ribosomal RNA Genes               | <i>rrn16</i> <sup>b</sup>       | <i>rrn23</i> <sup>b</sup>      | <i>rrn4.5</i> <sup>b</sup>   | <i>rrn5</i> <sup>b</sup>     |                              |                           |                 |                              |                              |  |
|                                 |                                   | <i>trnA-UGC</i> <sup>a,b</sup>  | <i>trnC-GCA</i>                | <i>trnD-GUC</i>              | <i>trnE-UUC</i>              | <i>trnF-GAA</i>              | <i>trnI-M-CAU</i>         | <i>trnG-GCC</i> | <i>trnG-UCC</i> <sup>a</sup> | <i>trnH-GUG</i>              |  |
|                                 | Transfer RNA Genes                | <i>trnI-CAU</i> <sup>b</sup>    | <i>trnI-GAU</i> <sup>a,b</sup> | <i>trnK-UUU</i> <sup>a</sup> | <i>trnL-CAA</i> <sup>b</sup> | <i>trnL-UAA</i> <sup>a</sup> | <i>trnL-UAG</i>           | <i>trnM-CAU</i> | <i>trnN-GUU</i> <sup>b</sup> | <i>trnP-UGG</i>              |  |
|                                 |                                   | <i>trnQ-UUG</i>                 | <i>trnR-ACG</i> <sup>b</sup>   | <i>trnR-UCU</i>              | <i>trnS-GCU</i>              | <i>trnS-GGA</i>              | <i>trnS-UGA</i>           | <i>trnT-GGU</i> | <i>trnT-UGU</i>              | <i>trnV-GAC</i> <sup>b</sup> |  |
|                                 |                                   | <i>trnV-UAC</i> <sup>a</sup>    | <i>trnW-CCA</i>                | <i>trnY-GUA</i>              |                              |                              |                           |                 |                              |                              |  |
|                                 |                                   | Translational initiation factor | <i>infA</i> <sup>c</sup>       |                              |                              |                              |                           |                 |                              |                              |  |
| <b>Genes for photosynthesis</b> | Subunits of photosystem I         | <i>psaA</i>                     | <i>psaB</i>                    | <i>psaC</i>                  | <i>psaI</i>                  | <i>psaJ</i>                  | <i>ycf3</i> <sup>a</sup>  | <i>ycf4</i>     |                              |                              |  |
|                                 | Subunits of photosystem II        | <i>psbA</i>                     | <i>psbB</i>                    | <i>psbC</i>                  | <i>psbD</i>                  | <i>psbE</i>                  | <i>psbF</i>               | <i>psbH</i>     | <i>psbI</i>                  | <i>psbJ</i>                  |  |
|                                 |                                   | <i>psbK</i>                     | <i>psbL</i>                    | <i>psbM</i>                  | <i>psbN</i>                  | <i>psbT</i>                  | <i>psbZ</i>               |                 |                              |                              |  |
|                                 | Subunits of cytochrome            | <i>petA</i>                     | <i>petB</i> <sup>a</sup>       | <i>petD</i> <sup>a</sup>     | <i>petG</i>                  | <i>petL</i>                  | <i>petN</i>               |                 |                              |                              |  |
|                                 | Subunits of ATP synthase          | <i>atpA</i>                     | <i>atpB</i>                    | <i>atpE</i>                  | <i>atpF</i> <sup>a</sup>     | <i>atpH</i>                  | <i>atpI</i>               |                 |                              |                              |  |
|                                 | Large subunit of rubisco          | <i>rbcL</i>                     |                                |                              |                              |                              |                           |                 |                              |                              |  |
|                                 | Subunits of NADH-dehydrogenase    | <i>ndhA</i> <sup>a</sup>        | <i>ndhB</i> <sup>a,b</sup>     | <i>ndhC</i>                  | <i>ndhD</i>                  | <i>ndhE</i>                  | <i>ndhF</i>               | <i>ndhG</i>     | <i>ndhH</i>                  | <i>ndhI</i>                  |  |
|                                 | <i>ndhJ</i>                       | <i>ndhK</i>                     |                                |                              |                              |                              |                           |                 |                              |                              |  |
| <b>Other genes</b>              | Subunit of Acetyl-CoA-carboxylase | <i>accD</i>                     |                                |                              |                              |                              |                           |                 |                              |                              |  |

| Category of genes             | Group of genes                   | Name of genes                                                                 |
|-------------------------------|----------------------------------|-------------------------------------------------------------------------------|
|                               | c-type cytochrome synthesis gene | <i>ccsA</i>                                                                   |
|                               | Envelope membrane protein        | <i>cemA</i>                                                                   |
|                               | Protease                         | <i>clpP<sup>a</sup></i>                                                       |
|                               | Maturase                         | <i>matK</i>                                                                   |
|                               | Component of TIC complex         | <i>ycf1<sup>b,c*</sup></i>                                                    |
| <b>Genes unknown function</b> | Unknown function                 | <i>ycf2<sup>b</sup></i> <i>ycf15<sup>b,c</sup></i> <i>ycf68<sup>b,c</sup></i> |

<sup>a</sup> Intron-containing gene; <sup>b</sup> Duplicated genes; <sup>c</sup> Pseudogene; <sup>c\*</sup> *ycf1* is pseudogene at the boundary between IRB and SSC regions; <sup>\*</sup> *rps12* is trans-spliced with the 5'-end located in the LSC region and the duplicated 3'-end in the IR region.
